# Supplementary material for: Proanthocyanidins isolated from the leaves of Photinia × fraseri block the cell cycle and induce apoptosis by inhibiting tyrosinase activity in melanoma cells
Source: Royal Society of Chemistry journal article supplement (doi:10.1039/d1fo00134e), 2021-01-01
Supplement: d1fo00134e1.pdf [file d1fo00134e1.pdf]

Supplemental table 1 Primers used in this study

| Gene name | Primer name | Primers sequences(5'-3') |
|-----------|-------------|--------------------------|
| β-actin   | Forward     | GGAGATTACTGCCCTGGCTCCTA  |
|           | Reverse     | GACTCATCGTACTCCTGCTTGCTG |
| MITF      | Forward     | CGAAAGTTGCAACGRGAACAGCA  |
|           | Reverse     | GAGCCTGCATTTCAAGTTCCTGTA |
| TRP-1     | Forward     | CTGGATCAATGGATAGAACTGCC  |
|           | Reverse     | CGACTGGCCTTGTTCCAAGT     |
